# Supplementary material
Source: HighWire-hosted journal article supplement (http://www.jneurosci.org/highwire/filestream/599689/field_highwire_adjunct_files/0/FIgure_S2.pdf)
Supplement: FIgure_S2.pdf [file FIgure_S2.pdf]

## Supplemental Figure 2

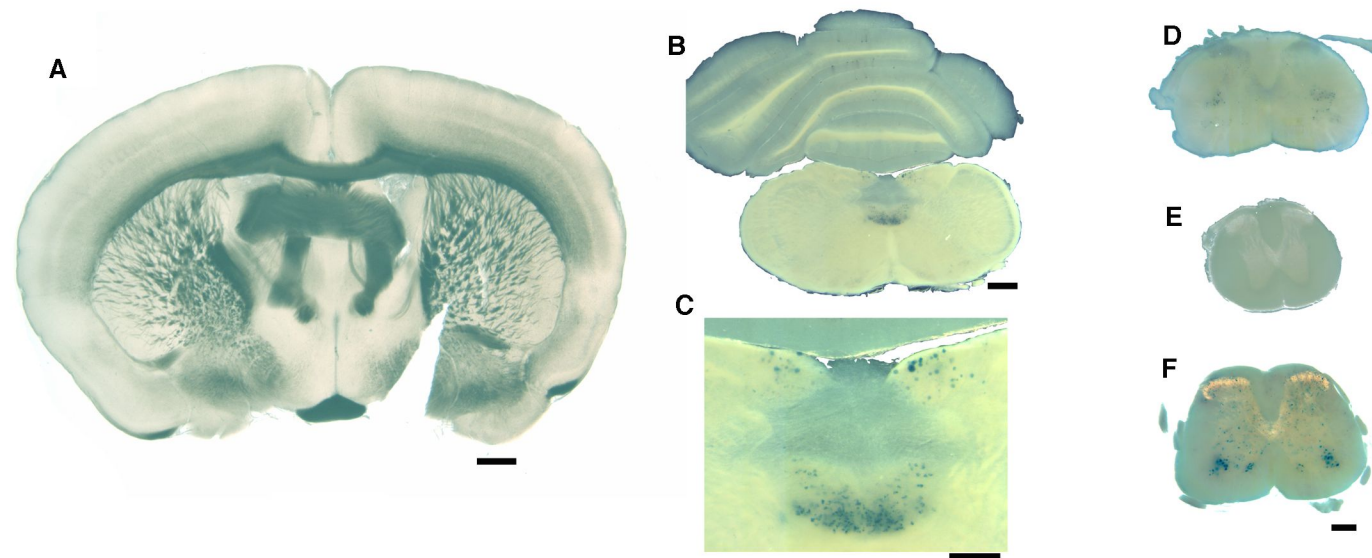

Results of HB9-Cre x ROSA 26 breeding

|       | <b>Cervical</b> |              | <b>Thoracic</b> |              | <b>Lumbar</b> |              |
|-------|-----------------|--------------|-----------------|--------------|---------------|--------------|
|       | Motor neurons   | Interneurons | Motor neurons   | Interneurons | Motor neurons | Interneurons |
| P23   | 8/8             | 5/8          | 3/8             | 3/8          | 8/8           | 3/8          |
| Adult | 5/8             | 5/8          | 4/8             | 4/8          | 8/8           | 8/8          |
